# Supplementary material for: Variants Affecting Exon Skipping Contribute to Complex Traits
Source: PubMed Central journal article supplement (PMC3486879; doi:10.1371/journal.pgen.1002998), 2012-10-25
Supplement: pgen.1002998.s005.pdf [file pgen.1002998.s005.pdf]

**Table S1. Enrichment of ISE SNPs for Human Trait-Associated SNPs.**

| <b>Distance to splice junction of ISE SNP</b> | <b>Enrichment p-value when conditioning on MAF</b> | <b>Enrichment p-value when conditioning on both MAF and the distance to the nearest exon</b> |
|-----------------------------------------------|----------------------------------------------------|----------------------------------------------------------------------------------------------|
| <60bp                                         | 0.054                                              | 0.090                                                                                        |
| <200bp                                        | 0.004                                              | 0.032                                                                                        |
| <1kbp                                         | 0.033                                              | 0.340                                                                                        |
| <5kbp                                         | 0.015                                              | 0.279                                                                                        |
| All Distance                                  | 0.006                                              | 0.036                                                                                        |
