# Supplementary material for: Variants Affecting Exon Skipping Contribute to Complex Traits
Source: PLOS journal article supplement (doi:10.1371/journal.pgen.1002998), 2012-10-25
Supplement: S2 (10.1371/journal.pgen.1002998.s002) [file journal.pgen.1002998.s002.pdf › journal.pgen.1002998.s002.pdf]

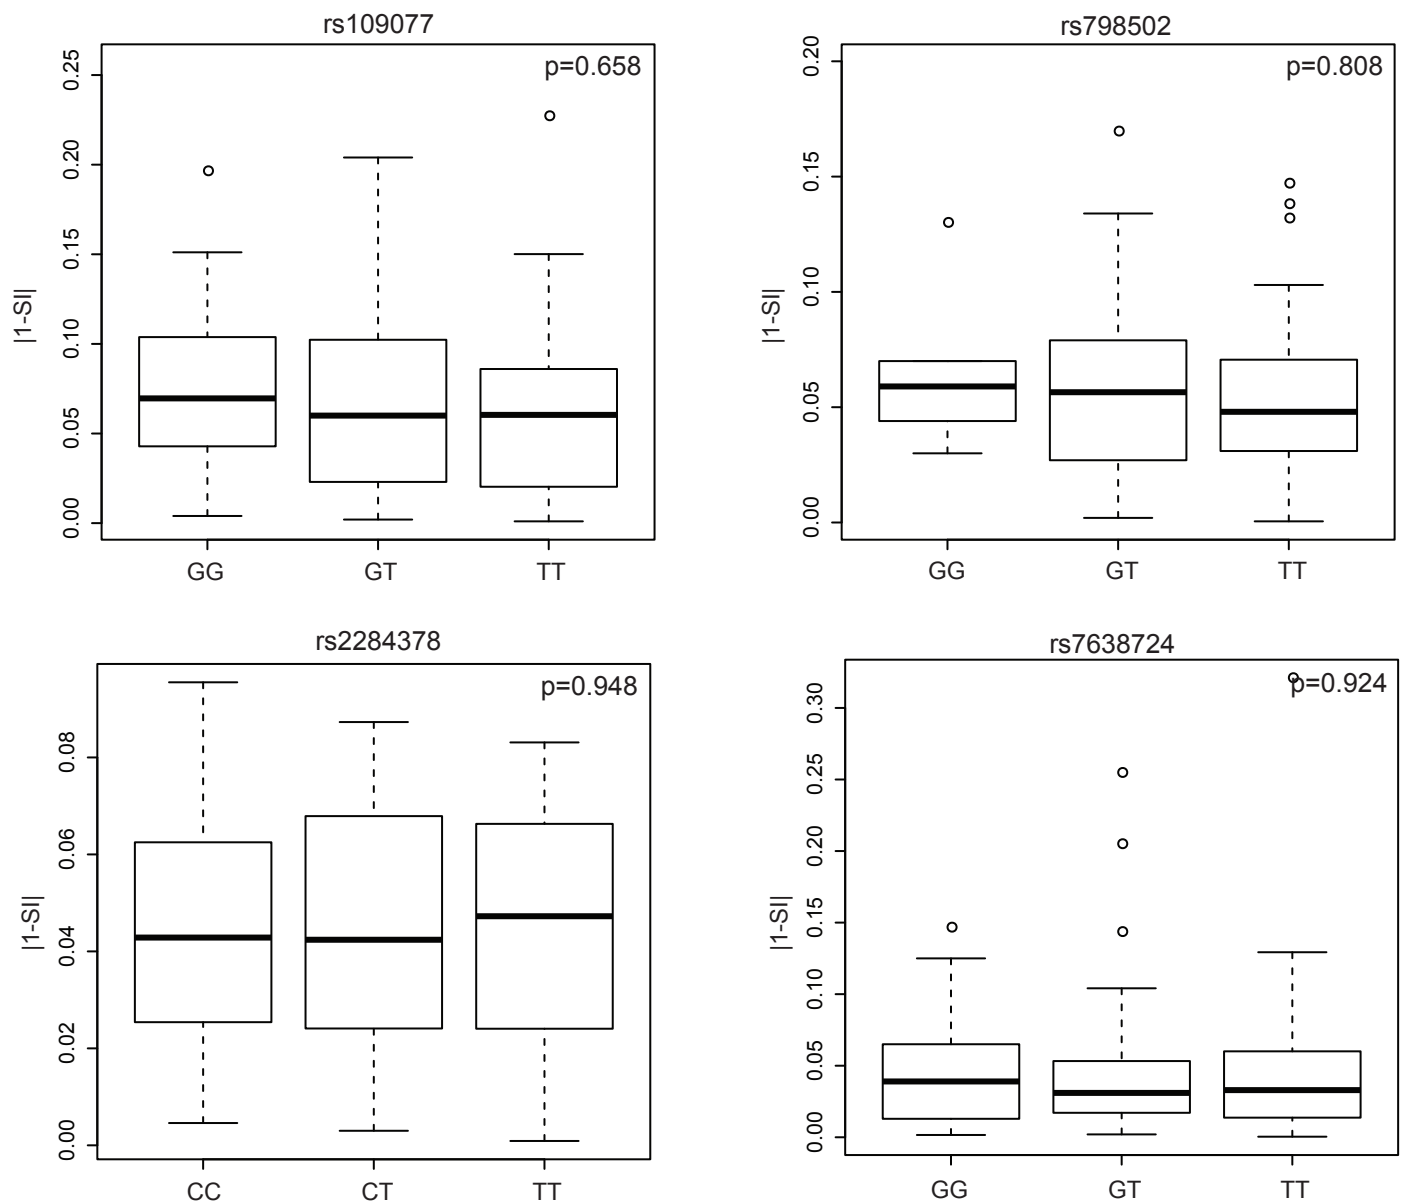

**Figure S2. SNPs Located in Multiple ISE Motifs Are Not Associated with a Change in Exon Skipping Level.** The y-axis is the absolute value of 1 minus SI ( $|1-SI|$ ); here, a higher level of  $|1-SI|$  corresponds to a higher level of exon skipping. We tested the correlation of genotype with exon skipping. There was no statistical correlation found between each SNP and exon skipping.
