# Supplementary material for: Variants Affecting Exon Skipping Contribute to Complex Traits
Source: PLOS journal article supplement (doi:10.1371/journal.pgen.1002998), 2012-10-25
Supplement: S3 (10.1371/journal.pgen.1002998.s003) [file journal.pgen.1002998.s003.pdf › journal.pgen.1002998.s003.pdf]

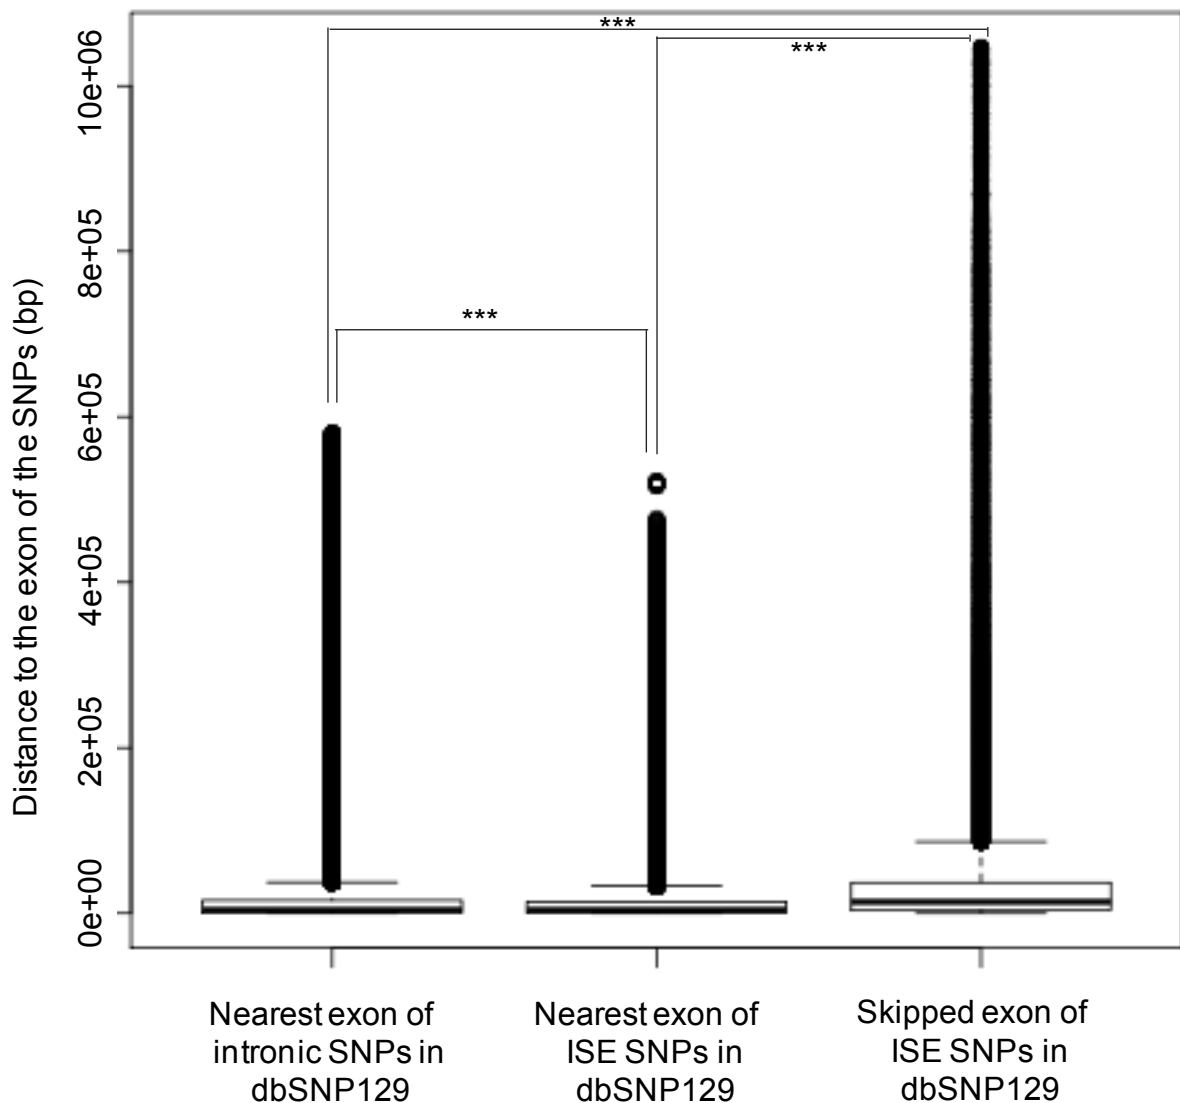

**Figure S3. ISE SNPs Are Not Likely to Be Closer to the Skipped Exon Than Intronic SNPs Are to Nearest Exon.** P-value was calculated by using a two-sample Kolmogorov-Smirnov Test.
