# Supplementary material for: Variants Affecting Exon Skipping Contribute to Complex Traits
Source: PLOS journal article supplement (doi:10.1371/journal.pgen.1002998), 2012-10-25
Supplement: S6 (10.1371/journal.pgen.1002998.s006) [file journal.pgen.1002998.s006.pdf › journal.pgen.1002998.s006.pdf]

**Table S2. Structural Comparisons of the Selected Four Pairs of Alternative Splice Isoforms in Table 1.**

| <b>Exon gene</b> | <b>Skipped exon<sup>a</sup></b> | <b>Longer isoform<sup>b</sup></b> | <b>Shorter isoform<sup>c</sup></b> | <b>C-score<sup>d</sup></b> | <b>RMSD (Å)<sup>e</sup></b> | <b>TM-score<sup>f</sup></b> |
|------------------|---------------------------------|-----------------------------------|------------------------------------|----------------------------|-----------------------------|-----------------------------|
| RNF8             | 7 (69 aa)                       | ENSP000000362578                  | ENSP000000229866                   | -1.28/-2.30                | 7.34                        | 0.199                       |
| SLC25A15         | 3 (46 aa)                       | ENSP000000342267                  | ENSP000000368838                   | 1.39/-0.81                 | 3.57                        | 0.354                       |
| PPP5C            | 5 (22 aa)                       | ENSP000000012443                  | ENSP000000375786                   | 0.22/0.36                  | 0.66                        | 0.739                       |
| NARF             | 3 (45 aa)                       | ENSP000000309899                  | ENSP000000283996                   | 0.38/1.00                  | 2.37                        | 0.809                       |

<sup>a</sup> Position of skipped exon in longer isoform. The length of amino acid encoded by the skipped exon is given in parenthesis.

<sup>b</sup> Isoform including the exon which is skipped in shorter isoform.

<sup>c</sup> Isoform in which exon is skipped.

<sup>d</sup> Confidence score for the quality of predicted models by I-TASSER. C-score of higher value signifies a model with a high confidence and vice-versa. (longer isoform/shorter isoform)

<sup>e</sup> Value between residues that are structurally aligned by TM-align.

<sup>f</sup> Scale for measuring the structural similarity between two structures. TM-score >0.5 indicates a model of correct topology and a TM-score<0.17 means a random similarity.
